# Supplementary material for: Inadequate use and regulation of interventions against publication bias decreases their effectiveness: a systematic review
Source: PubMed Central journal article supplement — J Clin Epidemiol. 2015 Jul;68(7):792–802. doi: 10.1016/j.jclinepi.2015.01.008 (PMC4459964; doi:10.1016/j.jclinepi.2015.01.008), 2015-07
Supplement: mmc1.pdf [file mmc1.pdf]

## Additional material 1: Literature Searches

### General Search

PubMed:

| Search | Query                                                | Items found |
|--------|------------------------------------------------------|-------------|
| #1     | Search "Publication Bias"[Mesh]                      | 1747        |
| #2     | Search "Bias (Epidemiology)"[Mesh]                   | 44583       |
| #3     | Search "Selection Bias"[Mesh]                        | 3159        |
| #4     | Search "Prejudice"[Mesh]                             | 20912       |
| #5     | Search "bias"[tiab]                                  | 64678       |
| #6     | Search #1 OR #2 OR #3 OR #4 OR #5                    | 122639      |
| #7     | Search "Research/ standards"[Mesh]                   | 19170       |
| #8     | Search "Publishing/standards"[Mesh]                  | 5410        |
| #9     | Search "Quality Control"[Mesh]                       | 36731       |
| #10    | Search "Writing/standards"[Mesh]                     | 1168        |
| #11    | Search "Journalism, Medical/ standards"[Mesh]        | 584         |
| #12    | Search #7 OR #8 OR #9 OR #10 OR #11                  | 59526       |
| #13    | Search #6 AND #12                                    | 3044        |
| #14    | Search "Registries"[Mesh]                            | 46060       |
| #15    | Search "Evidence-Based Medicine"[Mesh]               | 45157       |
| #16    | Search "Clinical Trials as Topic"[Mesh]              | 250161      |
| #17    | Search "Review Literature as Topic"[Mesh]            | 6050        |
| #18    | Search "Practice Guidelines as Topic"[Mesh]          | 65868       |
| #19    | Search "Meta-Analysis as Topic"[Mesh]                | 11809       |
| #20    | Search "Periodicals as Topic"[Mesh]                  | 31483       |
| #21    | Search #14 OR #15 OR #16 OR #17 OR #18 OR #19 OR #20 | 424261      |
| #22    | Search #13 AND #21                                   | 1018        |

Update Search April 2014

| Search | Query                                        | Items found |
|--------|----------------------------------------------|-------------|
| #1     | Search " <b>Publication Bias</b> "[Mesh]     | 2554        |
| #2     | Search " <b>Bias (Epidemiology)</b> "[Mesh]  | 49953       |
| #3     | Search " <b>Selection Bias</b> "[Mesh]       | 3440        |
| #4     | Search " <b>Prejudice</b> "[Mesh]            | 22765       |
| #5     | Search " <b>bias</b> "[tiab]                 | 81851       |
| #6     | Search #1 OR #2 OR #3 OR #4 OR #5            | 146230      |
| #7     | Search " <b>Research/ standards</b> "[Mesh]  | 21600       |
| #8     | Search " <b>Publishing/standards</b> "[Mesh] | 5998        |
| #9     | Search " <b>Quality Control</b> "[Mesh]      | 40039       |
| #10    | Search " <b>Writing/standards</b> "[Mesh]    | 1632        |

|     |                                                      |         |
|-----|------------------------------------------------------|---------|
| #11 | Search "Journalism, Medical/ standards"[Mesh]        | 632     |
| #12 | Search #7 OR #8 OR #9 OR #10 OR #11                  | 65656   |
| #13 | Search #6 AND #12                                    | 3444    |
| #14 | Search "Registries"[Mesh]                            | 54898   |
| #15 | Search "Evidence-Based Medicine"[Mesh]               | 52759   |
| #16 | Search "Clinical Trials as Topic"[Mesh]              | 272882  |
| #17 | Search "Review Literature as Topic"[Mesh]            | 7270    |
| #18 | Search "Practice Guidelines as Topic"[Mesh]          | 77685   |
| #19 | Search "Meta-Analysis as Topic"[Mesh]                | 13223   |
| #20 | Search "Periodicals as Topic"[Mesh]                  | 36028   |
| #21 | Search #14 OR #15 OR #16 OR #17 OR #18 OR #19 OR #20 | 477395  |
| #22 | Search #13 AND #21                                   | 1188    |
| #23 | Search 2012:2014[dp]                                 | 2303446 |
| #24 | Search 2012:2014[edat]                               | 2188306 |
| #25 | Search #23 OR #24                                    | 2345454 |
| #26 | Search #22 AND #25                                   | 169     |

#### EMBASE:

| No. | Query                    | Results    |
|-----|--------------------------|------------|
| #1  | 'bias':ti OR 'bias':ab   | 73,191     |
| #2  | 'publication'/exp        | 108,591    |
| #3  | 'types of study'/exp     | 19,509,350 |
| #4  | 'medical literature'/exp | 113,548    |
| #5  | 'outcome assessment'/exp | 159,312    |
| #6  | #3 OR #4 OR #5           | 19,550,408 |
| #7  | #1 AND #2 AND #6         | 975        |

Update Search April 2014

| No. | Query                               | Results  |
|-----|-------------------------------------|----------|
| #1  | 'bias':ab,ti                        | 91286    |
| #2  | 'publication'/exp                   | 120332   |
| #3  | 'types of study'/exp                | 21146044 |
| #4  | 'medical literature'/exp            | 124461   |
| #5  | 'outcome assessment'/exp            | 232087   |
| #6  | #3 OR #4 OR #5                      | 21189870 |
| #7  | #1 AND #2 AND #6                    | 1249     |
| #8  | #1 AND #2 AND #6 AND [2012-2014]/py | 298      |

#### The Cochrane Library: :

| ID | Search                   | Hits  |
|----|--------------------------|-------|
| #1 | "Publication Bias"[Mesh] | 10284 |

|     |                                                 |       |
|-----|-------------------------------------------------|-------|
| #2  | "Bias (Epidemiology)"[Mesh]                     | 542   |
| #3  | "Selection Bias"[Mesh]                          | 4103  |
| #4  | "Prejudice"[Mesh]                               | 287   |
| #5  | "bias"[tiab]                                    | 26095 |
| #6  | (#1 OR #2 OR #3 OR #4 OR #5)                    | 26299 |
| #7  | "Research/ standards"[Mesh]                     | 64    |
| #8  | "Publishing/standards"[Mesh]                    | 11    |
| #9  | "Quality Control"[Mesh]                         | 1090  |
| #10 | "Writing/standards"[Mesh]                       | 6     |
| #11 | "Journalism, Medical/ standards"[Mesh]          | 1     |
| #12 | (#7 OR #8 OR #9 OR #10 OR #11)                  | 1160  |
| #13 | (#6 AND #12)                                    | 254   |
| #14 | "Registries"[Mesh]                              | 1463  |
| #15 | "Evidence-Based Medicine"[Mesh]                 | 3024  |
| #16 | "Clinical Trials as Topic"[Mesh]                | 35167 |
| #17 | "Review Literature as Topic"[Mesh]              | 91    |
| #18 | "Practice Guidelines as Topic"[Mesh]            | 1403  |
| #19 | "Meta-Analysis as Topic"[Mesh]                  | 548   |
| #20 | "Periodicals as Topic"[Mesh]                    | 71    |
| #21 | (#14 OR #15 OR #16 OR #17 OR #18 OR #19 OR #20) | 41128 |
| #22 | (#13 AND #21)                                   | 57    |

Update Search April 2014

| ID  | Search                                             | Hits  |
|-----|----------------------------------------------------|-------|
| #1  | [mh "publication bias"]                            | 411   |
| #2  | [mh "Bias (Epidemiology)"]                         | 2428  |
| #3  | [mh "Selection Bias"]                              | 126   |
| #4  | [mh Prejudice]                                     | 271   |
| #5  | bias:ti,ab,kw (Word variations have been searched) | 12515 |
| #6  | #1 or #2 or #3 or #4 or #5                         | 14331 |
| #7  | [mh research/ST]                                   | 406   |
| #8  | [mh publishing/ST]                                 | 29    |
| #9  | [mh "quality control"]                             | 496   |
| #10 | [mh writing/ST]                                    | 14    |
| #11 | [mh "journalism, medical"/ST]                      | 1     |
| #12 | #7 or #8 or #9 or #10 or #11                       | 907   |
| #13 | #6 and #12                                         | 82    |
| #14 | [mh registries]                                    | 719   |
| #15 | [mh "Evidence-Based Medicine"]                     | 1905  |
| #16 | [mh "Clinical Trials as Topic"]                    | 55615 |
| #17 | [mh "Review Literature as Topic"]                  | 129   |
| #18 | [mh "Practice Guidelines as Topic"]                | 1717  |
| #19 | [mh "Meta-Analysis as Topic"]                      | 552   |
| #20 | [mh "Periodicals as Topic"]                        | 81    |

|     |                                                |       |
|-----|------------------------------------------------|-------|
| #21 | #14 or #15 or #16 or #17 or #18 or #19 or #20  | 59338 |
| #22 | #13 and #21 Publication Date from 2012 to 2014 | 3     |

**CINAHL, AMED, PsycINFO:**

| #   | Query                                    | Results |
|-----|------------------------------------------|---------|
| S11 | S5 or S10                                | 604     |
| S10 | S8 and S9                                | 85      |
| S9  | S2 or S7                                 | 101193  |
| S8  | S1 and S6                                | 1102    |
| S7  | (MH "Publishing+")                       | 100879  |
| S6  | (MH "Bias (Research)+")                  | 6823    |
| S5  | S3 or S4                                 | 550     |
| S4  | S1 and S2                                | 56      |
| S3  | (MH "Publication Bias")                  | 515     |
| S2  | (DE "PUBLICATIONS") OR (DE "PUBLISHING") | 5208    |
| S1  | TI bias OR AB bias                       | 43752   |

Update Search April 2014

| #   | Query                                                  | Results |
|-----|--------------------------------------------------------|---------|
| S12 | S5 OR S10 Limiters - Published Date: 20120101-20141231 | 207     |
| S11 | S5 OR S10                                              | 806     |
| S10 | S8 AND S9                                              | 102     |
| S9  | S2 OR S7                                               | 118,833 |
| S8  | S1 AND S6                                              | 1,312   |
| S7  | (MH "Publishing+")                                     | 118,465 |
| S6  | MH "Bias (Research)+"                                  | 7,896   |
| S5  | S3 OR S4                                               | 740     |
| S4  | S1 AND S2                                              | 62      |
| S3  | MH publication bias OR DE publication bias             | 699     |
| S2  | DE PUBLICATIONS OR DE PUBLISHING                       | 6,209   |
| S1  | TI bias OR AB bias                                     | 53,775  |

## Known Interventions (May 2014)

### 1. Prospective trial Registration

PubMed:

| Search | Query                                                                                                                                                                                                                                                                                                                                                                                                                                                                 | Items found |
|--------|-----------------------------------------------------------------------------------------------------------------------------------------------------------------------------------------------------------------------------------------------------------------------------------------------------------------------------------------------------------------------------------------------------------------------------------------------------------------------|-------------|
| #1     | Search (("prospective registration"[tiab] AND (Trial[tiab] OR trials[tiab])) OR "prospective trial registration"[tiab] OR "trial registration policy"[tiab] OR ("compulsory registration"[tiab] AND (trial[tiab] OR trials[tiab])) OR "compulsory trial registration"[tiab] OR ("mandatory registration"[tiab] AND (trial OR trials[tiab])) OR "mandatory trial registration"[tiab] OR (registration[tiab] AND (trial[tiab] OR trials[tiab]) AND precondition[tiab])) | 55          |
| #2     | Search (publication bias[MeSH Terms] OR bias epidemiology[MeSH Terms] OR information dissemination[MeSH Terms] OR clinical trials as topic[MeSH Terms] OR databases as topic[MeSH Terms] OR databases, factual[MeSH Terms] OR quality control[MeSH Terms] OR registries[MeSH Terms])                                                                                                                                                                                  | 505052      |
| #3     | Search ("Publishing/ethics"[Mesh] OR "Publishing/methods"[Mesh] OR "Publishing/standards"[Mesh] OR "Publishing/statistics and numerical data"[Mesh] OR "Publishing/trends"[Mesh])                                                                                                                                                                                                                                                                                     | 11324       |
| #4     | Search (bias*[tiab] OR transparency[tiab] OR (disclos*[tiab] AND (results[tiab] OR outcome[tiab])) OR "Program Evaluation"[Mesh])                                                                                                                                                                                                                                                                                                                                     | 194952      |
| #5     | Search (#1 AND (#2 OR #3 OR #4))                                                                                                                                                                                                                                                                                                                                                                                                                                      | 46          |
| #14    | Search (#5 NOT ("Editorial" [Publication Type] OR "Comment" [Publication Type] OR "Ephemera"[Publication Type] OR "Guideline"[Publication Type]))                                                                                                                                                                                                                                                                                                                     | 30          |

The Cochrane Library:

| ID | Search                                                                                                                                                                                                                                                                                        | Hits  |
|----|-----------------------------------------------------------------------------------------------------------------------------------------------------------------------------------------------------------------------------------------------------------------------------------------------|-------|
| #1 | ((("prospective registration" or "compulsory registration" or "mandatory registration") near/2 (trial or trials)) or "prospective trial registration" or "compulsory trial registration" or "mandatory trial registration" or (registration near/3 (trial or trials) and precondition)):ti,ab | 34    |
| #2 | [mh "publication bias"] or [mh "clinical trial as topic"] or [mh "databases as topic"] or [mh "database, factual"] or [mh "information dissemination"] or [mh "quality control"] or [mh registries] or [mh "bias epidemiology"]                                                               | 60069 |
| #3 | [mh publishing/ST,SN,MT,ES,TD]                                                                                                                                                                                                                                                                | 42    |
| #4 | bias:ti,ab,kw or transparency:ti,ab,kw                                                                                                                                                                                                                                                        | 12795 |
| #5 | (disclos* or publicat*):ti,ab near/3 (result* or outcome*):ti,ab                                                                                                                                                                                                                              | 690   |
| #6 | #2 or #3 or #4 or #5                                                                                                                                                                                                                                                                          | 70194 |
| #7 | #1 and #6                                                                                                                                                                                                                                                                                     | 11    |

CINAHL,AMED,PsycINFO:

| ID | Search | Hits |
|----|--------|------|
|----|--------|------|

|    |                                                                                                                                                                                                                                                             |    |
|----|-------------------------------------------------------------------------------------------------------------------------------------------------------------------------------------------------------------------------------------------------------------|----|
| S1 | ( "prospective trial registration" OR "trial* registration policy" OR "compulsory trial registration" OR "mandatory trial registration" ) OR ( ("prospective registration" OR "mandatory registration" OR "compulsory registration") n3 (trial or trials) ) | 20 |
|----|-------------------------------------------------------------------------------------------------------------------------------------------------------------------------------------------------------------------------------------------------------------|----|

EMBASE:

| No. | Query                                                                                                                                                                                                                                                                            | Results |
|-----|----------------------------------------------------------------------------------------------------------------------------------------------------------------------------------------------------------------------------------------------------------------------------------|---------|
| #1  | 'statistical bias'/exp OR bias:ab,ti                                                                                                                                                                                                                                             | 108355  |
| #2  | 'register'/exp OR 'factual database'/exp OR 'publishing'/exp                                                                                                                                                                                                                     | 132214  |
| #3  | 'prospective trial registration':ab,ti OR (trial* NEXT/1 'registration policy'):ab,ti OR ((compulsory OR mandatory) NEXT/1 'trial registration'):ab,ti OR (('prospective registration' OR 'mandatory registration' OR 'compulsory registration') NEAR/3 (trial OR trials)):ab,ti | 80      |
| #4  | #1 OR #2                                                                                                                                                                                                                                                                         | 236715  |
| #5  | #3 AND #4                                                                                                                                                                                                                                                                        | 44      |
| #6  | #5 AND [embase]/lim NOT [medline]/lim                                                                                                                                                                                                                                            | 11      |

## 2. Peer Review

PubMed:

| Search | Query                                                                                                                                                                                | Items found |
|--------|--------------------------------------------------------------------------------------------------------------------------------------------------------------------------------------|-------------|
| #1     | Search ("open peer review"[tiab] OR "anonymous peer review"[tiab] OR "blinded peer review"[tiab])                                                                                    | 84          |
| #2     | Search "peer review"[mh] AND (blinded[tiab] OR blinding[tiab] OR "anonymous review"[tiab] OR "open review"[tiab])                                                                    | 118         |
| #3     | Search "peer review"[mh] AND ("review process"[tiab] OR practice[tiab] OR practices[tiab] OR methods[tiab] OR method[tiab]) AND (changed[tiab] OR changes[tiab] OR change[tiab])     | 291         |
| #4     | Search publication bias[MeSH Terms] OR bias epidemiology[MeSH Terms] OR information dissemination[MeSH Terms] OR clinical trials as topic[MeSH Terms] OR quality control[MeSH Terms] | 370518      |
| #5     | Search editorial policies[MeSH Terms] OR review literature as topic[MeSH Terms] OR periodicals as topic[MeSH Terms]                                                                  | 44782       |
| #6     | Search "Publishing/ethics"[Mesh] OR "Publishing/methods"[Mesh] OR "Publishing/standards"[Mesh] OR "Publishing/statistics and numerical data"[Mesh] OR "Publishing/trends"[Mesh]      | 11324       |
| #7     | Search (#1 OR #2 OR #3)                                                                                                                                                              | 466         |
| #8     | Search (#4 OR #5 OR #6)                                                                                                                                                              | 415575      |
| #9     | Search (#7 AND #8)                                                                                                                                                                   | 211         |
| #10    | Search (#9 NOT ("Editorial" [Publication Type] OR "Comment" [Publication Type] OR "Ephemera"[Publication Type] OR "Guideline"[Publication Type]))                                    | 181         |

The Cochrane Library:

| ID | Search | Hits |
|----|--------|------|
|----|--------|------|

|    |                                                                                                                                                                                                                                                                                         |        |
|----|-----------------------------------------------------------------------------------------------------------------------------------------------------------------------------------------------------------------------------------------------------------------------------------------|--------|
| #1 | [mh "peer review"] and (blinded or blinding or "anonymous review" or "open review"):ti,ab                                                                                                                                                                                               | 20     |
| #2 | [mh "peer review"] and (("review process" or practice or practices or methods or method) and chang*):ti,ab                                                                                                                                                                              | 20     |
| #3 | ((open or anonymous or blinded) next/2 "peer review"):ti,ab                                                                                                                                                                                                                             | 25     |
| #4 | [mh publishing/ST,SN,MT,ES,TD] or [mh "Clinical Trials as Topic"] or [mh "Periodicals as Topic"] or [mh "Editorial Policies"] or [mh "Review Literature as Topic"] or [mh "publication bias"] or [mh "bias epidemiology"] or [mh "information dissemination"] or [mh "quality control"] | 58838  |
| #5 | bias:ti,ab or discrimination:ti,ab,kw or quality:ti,ab                                                                                                                                                                                                                                  | 53621  |
| #6 | #1 or #2 or #3                                                                                                                                                                                                                                                                          | 56     |
| #7 | #4 or #5                                                                                                                                                                                                                                                                                | 106650 |
| #8 | #6 and #7                                                                                                                                                                                                                                                                               | 37     |

CINAHL,AMED,PsycINFO:

| #  | Query                                                                                                                                                                                                                                                      | Results |
|----|------------------------------------------------------------------------------------------------------------------------------------------------------------------------------------------------------------------------------------------------------------|---------|
| S1 | AB ("peer review" n2 (open OR anonymous OR blind OR blinding OR blinded)) OR TI ("peer review" n2 (open OR anonymous OR blind OR blinding OR blinded))                                                                                                     | 103     |
| S2 | AB ("peer review" n5 (("review process" OR practice OR practices OR methods OR method) AND (change OR changed OR changes))) OR TI ("peer review" n5 (("review process" OR practice OR practices OR methods OR method) AND (change OR changed OR changes))) | 92      |
| S3 | S1 OR S2                                                                                                                                                                                                                                                   | 192     |
| S4 | SU (bias OR quality)                                                                                                                                                                                                                                       | 220,174 |
| S5 | S3 AND S4                                                                                                                                                                                                                                                  | 30      |

EMBASE:

| No. | Query                                                                                                                                                                                     | Results |
|-----|-------------------------------------------------------------------------------------------------------------------------------------------------------------------------------------------|---------|
| #1  | ('peer review' NEAR/2 (open OR anonymous OR blind OR blinding OR blinded)):ab,ti                                                                                                          | 126     |
| #2  | ('peer review' NEAR/5 ('review process' OR practice OR practices OR methods OR method)):ab,ti AND (changed:ab,ti OR changes:ab,ti OR change:ab,ti OR evaluation:ab,ti OR evaluated:ab,ti) | 329     |
| #3  | 'peer review'/exp AND (blinded:ab,ti OR blinding:ab,ti OR 'anonymous review':ab,ti OR 'open review':ab,ti)                                                                                | 159     |
| #4  | #1 OR #2 OR #3                                                                                                                                                                            | 549     |
| #5  | 'information dissemination'/exp OR 'policy'/exp OR 'clinical trial (topic)'/exp OR 'quality control procedures'/exp                                                                       | 1567381 |
| #6  | 'statistical bias'/exp OR bias:ab,ti                                                                                                                                                      | 108355  |
| #7  | discrimination:ab,ti OR quality:ab,ti                                                                                                                                                     | 727432  |
| #8  | #5 OR #6 OR #7                                                                                                                                                                            | 2182919 |
| #9  | 'publishing'/exp OR 'publication'/exp                                                                                                                                                     | 142295  |
| #10 | #4 AND #8 AND #9                                                                                                                                                                          | 118     |
| #11 | #10 AND [embase]/lim NOT [medline]/lim                                                                                                                                                    | 23      |

### 3. Conflict of Interest

PubMed:

| Search | Query                                                                                                                                                                                                                                                                                                                                                                                                            | Items found |
|--------|------------------------------------------------------------------------------------------------------------------------------------------------------------------------------------------------------------------------------------------------------------------------------------------------------------------------------------------------------------------------------------------------------------------|-------------|
| #1     | Search ("conflict of interest"[mh] AND disclosure[mh])                                                                                                                                                                                                                                                                                                                                                           | 1500        |
| #2     | Search (((disclosure[tiab] OR disclose[tiab] OR disclosed[tiab]) AND (competing interest*[tiab] OR financial interest*[tiab])) OR author disclosure*[tiab])                                                                                                                                                                                                                                                      | 148         |
| #3     | Search ((disclosure[tiab] OR disclose[tiab] OR disclosed[tiab]) AND (conflict* of interest[tiab] OR conflicting interests[tiab]))                                                                                                                                                                                                                                                                                | 820         |
| #4     | Search (#1 OR #2 OR #3)                                                                                                                                                                                                                                                                                                                                                                                          | 2136        |
| #6     | Search ((reporting[tiab] OR reported[tiab]) AND (practice[tiab] OR practices[tiab] OR policy[tiab] OR policies[tiab]))                                                                                                                                                                                                                                                                                           | 70770       |
| #13    | Search (research support as topic[MeSH Terms] OR information dissemination[MeSH Terms] OR editorial policies[MeSH Terms] OR review literature as topic[MeSH Terms] OR periodicals as topic[MeSH Terms] OR "Publishing/ethics"[Mesh] OR "Publishing/methods"[Mesh] OR "Publishing/standards"[Mesh] OR "Publishing/statistics and numerical data"[Mesh] OR "Publishing/trends"[Mesh] OR "Guidelines as Topic"[mh]) | 187382      |
| #14    | Search (#13 OR #6)                                                                                                                                                                                                                                                                                                                                                                                               | 254638      |
| #16    | Search ("publication bias"[mh] OR bias[tiab] OR accuracy[tiab] OR quality[tiab])                                                                                                                                                                                                                                                                                                                                 | 842806      |
| #19    | Search (#4 AND #14)                                                                                                                                                                                                                                                                                                                                                                                              | 883         |
| #20    | Search (#19 AND #16)                                                                                                                                                                                                                                                                                                                                                                                             | 122         |
| #21    | Search (#20 NOT ("Editorial" [Publication Type] OR "Comment" [Publication Type] OR "Ephemera"[Publication Type] OR "Guideline"[Publication Type]))                                                                                                                                                                                                                                                               | 88          |

The Cochrane Library:

| ID  | Search                                                                                                                                                                                                                                | Hits  |
|-----|---------------------------------------------------------------------------------------------------------------------------------------------------------------------------------------------------------------------------------------|-------|
| #1  | [mh "conflict of interest"]                                                                                                                                                                                                           | 19    |
| #2  | (disclosure or disclose or disclosed):ti,ab near/3 ("competing interest" or "financial interest"):ti,ab                                                                                                                               | 3     |
| #3  | ((conflict* next/2 interest*) near/3 (disclosure or disclose or disclosed)):ti,ab                                                                                                                                                     | 34    |
| #4  | author disclosure:ti,ab                                                                                                                                                                                                               | 2     |
| #5  | [mh disclosure]                                                                                                                                                                                                                       | 302   |
| #6  | {or #1-#5}                                                                                                                                                                                                                            | 358   |
| #7  | ((reporting or reported) and (practice or practices or policy or policies)):ti,ab                                                                                                                                                     | 6793  |
| #8  | [mh publishing/ST,SN,MT,ES,TD] or [mh "Editorial Policies"] or [mh "information dissemination"] or [mh "research support as topic"] or [mh "Periodicals as Topic"] or [mh "Review Literature as Topic"] or [mh "guidelines as topic"] | 2444  |
| #9  | #7 or #8                                                                                                                                                                                                                              | 9080  |
| #10 | #6 and #9                                                                                                                                                                                                                             | 45    |
| #11 | [mh "publication bias"] or [mh "bias epidemiology"] or (bias or accuracy or quality):ti,ab                                                                                                                                            | 60386 |
| #12 | #10 and #11                                                                                                                                                                                                                           | 18    |



CINAHL,AMED,PsycINFO:

| #  | Query                                                                                                                                                                                    | Results |
|----|------------------------------------------------------------------------------------------------------------------------------------------------------------------------------------------|---------|
| S1 | TI (disclosure or disclose or disclosed) N3 ("competing interest" OR "financial interest") OR AB (disclosure or disclose or disclosed) N3 ("competing interest" OR "financial interest") | 3       |
| S2 | TI ((conflict* N2 interest*) N3 (disclosure or disclose or disclosed)) OR AB ((conflict* N2 interest*) N3 (disclosure or disclose or disclosed))                                         | 218     |
| S3 | S1 OR S2                                                                                                                                                                                 | 220     |
| S4 | SU bias OR accuracy OR quality                                                                                                                                                           | 473,2   |
| S5 | S3 AND S4                                                                                                                                                                                | 36      |

EMBASE:

| No. | Query                                                                                                                            | Results |
|-----|----------------------------------------------------------------------------------------------------------------------------------|---------|
| #1  | ((disclosure OR disclose OR disclosed) NEAR/3 ('competing interest' OR 'financial interest')):ab,ti                              | 19      |
| #2  | ('conflict of interest' OR 'conflict of interest' OR 'conflicting interests') NEAR/3 (disclosure OR disclose OR disclosed):ab,ti | 132     |
| #3  | 'author disclosure':ab,ti                                                                                                        | 19      |
| #5  | 'conflict of interest'/exp/mj AND (disclosure:ab,ti OR disclosures:ab,ti)                                                        | 314     |
| #6  | #1 OR #2 OR #3 OR #5                                                                                                             | 412     |
| #7  | 'financial management'/exp OR 'funding'/exp OR 'information dissemination'/exp OR 'publishing'/exp OR 'practice guideline'/exp   | 626140  |
| #8  | reporting:ab,ti OR reported:ab,ti AND (practice:ab,ti OR practices:ab,ti OR policy:ab,ti OR policies:ab,ti)                      | 90671   |
| #9  | #7 OR #8                                                                                                                         | 706058  |
| #10 | #6 AND #9                                                                                                                        | 224     |
| #11 | 'statistical bias'/exp OR bias:ab,ti OR accuracy:ab,ti OR quality:ab,ti                                                          | 1062886 |
| #12 | #10 AND #11                                                                                                                      | 44      |
| #13 | #12 AND [embase]/lim NOT [medline]/lim                                                                                           | 14      |

#### 4. Electronic Publishing

PubMed:

| Search | Query                                                                                                                                                                                                                                            | Items found |
|--------|--------------------------------------------------------------------------------------------------------------------------------------------------------------------------------------------------------------------------------------------------|-------------|
| #1     | Search (electronic publishing[tiab] OR electronic publication[tiab] OR electronic publications[tiab] OR online only journals[tiab] OR online journals[tiab] OR online publishing[tiab] OR online publication[tiab] OR online publications[tiab]) | 2975        |
| #2     | Search ("Review Literature as Topic"[Mesh] OR "Editorial Policies"[Mesh] OR "Periodicals as Topic"[Mesh] OR "Publishing"[Mesh:NoExp])                                                                                                            | 57384       |
| #3     | Search ((strategy[tiab] OR strategies[tiab] OR trend[tiab] OR trends[tiab] OR policy[tiab] OR policies[tiab]) AND (scholarly[tiab] OR academic[tiab] OR scientific[tiab]) AND (publishing[tiab] OR production[tiab]))                            | 1268        |
| #4     | Search (#2 OR #3)                                                                                                                                                                                                                                | 58436       |

|    |                                                                                                   |        |
|----|---------------------------------------------------------------------------------------------------|--------|
| #5 | Search <b>(#1 AND #4)</b>                                                                         | 212    |
| #6 | Search (" <b>Publication Bias</b> "[Mesh] OR " <b>Bias (Epidemiology)</b> "[Mesh] OR bias*[tiab]) | 155672 |
| #7 | Search ( <b>advantage*</b> [tiab] OR <b>benefit</b> [tiab] OR <b>opportunit*</b> [tiab])          | 624564 |
| #8 | Search <b>(#6 OR #7)</b>                                                                          | 770011 |
| #9 | Search <b>(#5 AND #8)</b>                                                                         | 25     |

The Cochrane Library:

| ID | Search                                                                        | Hits  |
|----|-------------------------------------------------------------------------------|-------|
| #1 | ((electronic or online) near/2 (publication or publishing or journals)):ti,ab | 117   |
| #2 | [mh "publication bias"] or [mh "Bias (Epidemiology)"] or bias*:ti,ab,kw       | 14332 |
| #3 | #1 and #2                                                                     | 22    |

CINAHL,AMED,PsycINFO:

| #  | Query                                                                                                                                        | Results |
|----|----------------------------------------------------------------------------------------------------------------------------------------------|---------|
| S1 | TI (electronic OR online) N2 (publication OR publishing OR journals) OR AB (electronic OR online) N2 (publication OR publishing OR journals) | 1,384   |
| S2 | SU publishing OR publication                                                                                                                 | 18,495  |
| S3 | S1 AND S2                                                                                                                                    | 247     |
| S4 | SU "publication bias" OR "access to information" OR "information dissemination"                                                              | 17,248  |
| S5 | TI bias* OR AB bias*                                                                                                                         | 73,882  |
| S6 | S4 OR S5                                                                                                                                     | 90,748  |
| S7 | S3 AND S6                                                                                                                                    | 55      |

EMBASE:

| No. | Query                                                                         | Results |
|-----|-------------------------------------------------------------------------------|---------|
| #1  | ((electronic OR online) NEAR/2 (publication OR publishing OR journals)):ab,ti | 3252    |
| #2  | 'publishing'/exp OR 'publication'/exp                                         | 142295  |
| #3  | #1 AND #2                                                                     | 488     |
| #6  | 'statistical bias'/exp OR bias*:ab,ti                                         | 141409  |
| #9  | 'access to information'/exp OR 'information dissemination'/exp                | 24653   |
| #10 | #6 OR #9                                                                      | 165805  |
| #11 | #3 AND #10                                                                    | 58      |
| #12 | #11 AND [embase]/lim NOT [medline]/lim                                        | 25      |

## 5. Open Access

PubMed:

| Search | Query                                                                                                                                                                                      | Items found |
|--------|--------------------------------------------------------------------------------------------------------------------------------------------------------------------------------------------|-------------|
| #1     | Search <b>open access</b> [tiab]                                                                                                                                                           | 2669        |
| #2     | Search (" <b>Publishing/methods</b> "[Mesh] OR " <b>Publishing/organization and administration</b> "[Mesh] OR " <b>Publishing/standards</b> "[Mesh] OR " <b>Publishing/trends</b> "[Mesh]) | 10715       |
| #3     | Search ( <b>editorial policies</b> [MeSH Terms] OR <b>review literature as topic</b> [MeSH Terms] OR <b>periodicals as topic</b> [MeSH Terms] OR                                           | 196014      |

|    |                                                                                                                                |        |
|----|--------------------------------------------------------------------------------------------------------------------------------|--------|
|    | <b>"Databases as Topic"[Mesh] OR "Access to Information"[Mesh] OR "Information Dissemination"[Mesh] OR "Registries"[Mesh])</b> |        |
| #4 | Search (#2 OR #3)                                                                                                              | 200964 |
| #5 | Search (#1 AND #4)                                                                                                             | 773    |
| #6 | Search ("Publication Bias"[Mesh] OR "Bias (Epidemiology)"[Mesh] OR bias*[tiab])                                                | 155818 |
| #7 | Search (#5 AND #6)                                                                                                             | 17     |

The Cochrane Library:

| ID  | Search                                                                                                                                                                       | Hits  |
|-----|------------------------------------------------------------------------------------------------------------------------------------------------------------------------------|-------|
| #1  | open access                                                                                                                                                                  | 212   |
| #2  | [mh publishing/ST,MT,OD,TD]                                                                                                                                                  | 30    |
| #3  | ((electronic or online or internet) near/6 (publication* or publishing or journal*)):ti,ab,kw or (dissemination or policy or policies):ti,ab,kw                              | 5894  |
| #4  | [mh "editorial policies"] or [mh "periodicals as topic"] or [mh "databases as topic"] or [mh registries] or [mh "access to information"] or [mh "information dissemination"] | 2270  |
| #5  | {or #2-#4}                                                                                                                                                                   | 7968  |
| #6  | #1 and #5                                                                                                                                                                    | 35    |
| #7  | [mh "publication bias"] or [mh "bias epidemiology"] or [mh "quality control"]                                                                                                | 3322  |
| #8  | bias*:ti,ab,kw                                                                                                                                                               | 12696 |
| #9  | #7 or #8                                                                                                                                                                     | 14806 |
| #10 | #6 and #9                                                                                                                                                                    | 8     |

CINAHL,AMED,PsycINFO:

| #  | Query                                                                                                                                                                          | Results |
|----|--------------------------------------------------------------------------------------------------------------------------------------------------------------------------------|---------|
| S1 | TI open access OR AB open access                                                                                                                                               | 1,497   |
| S2 | TI ( dissemination or policy or policies ) OR AB ( dissemination or policy or policies )                                                                                       | 165,713 |
| S3 | TI ( (electronic OR online OR internet) N6 (publication* OR publishing OR journal*) ) OR AB ( (electronic OR online OR internet) N6 (publication* OR publishing OR journal*) ) | 3,433   |
| S4 | S2 OR S3                                                                                                                                                                       | 168,877 |
| S5 | S1 AND S4                                                                                                                                                                      | 262     |
| S6 | TI bias* OR AB bias* OR SU bias*                                                                                                                                               | 73,907  |
| S7 | S5 AND S6                                                                                                                                                                      | 6       |

EMBASE:

| No. | Query                                                                                                                                        | Results |
|-----|----------------------------------------------------------------------------------------------------------------------------------------------|---------|
| #1  | 'open access':ab,ti                                                                                                                          | 4535    |
| #2  | 'publishing'/exp OR 'access to information'/exp OR 'information dissemination'/exp OR 'register'/exp OR 'data base'/exp OR 'publication'/exp | 430548  |
| #3  | ((electronic OR online OR internet) NEAR/6 (publication* OR publishing OR journal*)):ab,ti                                                   | 7620    |
| #4  | #2 OR #3                                                                                                                                     | 436402  |
| #5  | #1 AND #4                                                                                                                                    | 1242    |

|    |                                       |        |
|----|---------------------------------------|--------|
| #6 | bias*:ab,ti OR 'statistical bias'/exp | 141571 |
| #7 | #5 AND #6                             | 34     |

## 6. Right to Publication

PubMed:

| Search | Query                                                                                                                                                            | Items found |
|--------|------------------------------------------------------------------------------------------------------------------------------------------------------------------|-------------|
| #1     | Search <b>right to publi*[all fields]</b>                                                                                                                        | 1           |
| #2     | Search <b>((sponsored research[tiab] OR sponsored trial*[tiab] OR sponsored study[tiab] OR sponsored studies[tiab]) AND (publish*[tiab] OR publicat*[tiab]))</b> | 142         |
| #3     | Search <b>(#1 OR #2)</b>                                                                                                                                         | 143         |
| #4     | Search <b>("Publishing"[Mesh] OR "Information Dissemination"[Mesh] OR "Review Literature as Topic"[Mesh] OR "Periodicals as Topic"[Mesh])</b>                    | 77751       |
| #5     | Search <b>(right[tiab] OR disseminat*[tiab] OR reporting[tiab] OR reported[tiab])</b>                                                                            | 1683544     |
| #6     | Search <b>(#4 OR #5)</b>                                                                                                                                         | 1754176     |
| #7     | Search <b>(#3 AND #6)</b>                                                                                                                                        | 98          |
| #8     | Search <b>("Publication Bias"[Mesh] OR "Bias (Epidemiology)"[Mesh] OR bias*[tiab])</b>                                                                           | 155818      |
| #9     | Search <b>(#7 AND #8)</b>                                                                                                                                        | 38          |

The Cochrane Library:

| ID | Search                                                                                                       | Hits  |
|----|--------------------------------------------------------------------------------------------------------------|-------|
| #1 | right:ti,ab near/2 publi*:ti,ab                                                                              | 21    |
| #2 | (sponsored:ti,ab next/2 (research or trial* or study or studies):ti,ab) near/6 (publish* or publicat*):ti,ab | 10    |
| #3 | #1 or #2                                                                                                     | 30    |
| #4 | [mh "publication bias"] or [mh "bias epidemiology"] or bias*:ti,ab,kw                                        | 14334 |
| #5 | #3 and #4                                                                                                    | 13    |

CINAHL,AMED,PsycINFO:

| #  | Query                                                                                                                                                                                  | Results |
|----|----------------------------------------------------------------------------------------------------------------------------------------------------------------------------------------|---------|
| S1 | TI right N2 publi* OR AB right N2 publi*                                                                                                                                               | 433     |
| S2 | TI ( (sponsored N2 (research OR trial* OR study OR studies)) N6 (publish* OR publicat*) ) OR AB ( (sponsored N2 (research OR trial* OR study OR studies)) N6 (publish* OR publicat*) ) | 17      |
| S3 | S1 OR S2                                                                                                                                                                               | 450     |
| S4 | TI bias* OR AB bias*                                                                                                                                                                   | 73,907  |
| S5 | SU bias*                                                                                                                                                                               | 25,843  |
| S6 | S4 OR S5                                                                                                                                                                               | 82,818  |
| S7 | S3 AND S6                                                                                                                                                                              | 6       |

EMBASE:

| No. | Query | Results |
|-----|-------|---------|
|-----|-------|---------|

|     |                                                                                                           |         |
|-----|-----------------------------------------------------------------------------------------------------------|---------|
| #1  | (right NEAR/2 publi*):ab,ti                                                                               | 129     |
| #2  | (sponsored NEXT/2 (research OR trial* OR study OR studies)):ab,ti AND (publish*:ab,ti OR publicat*:ab,ti) | 326     |
| #3  | 'publishing'/exp OR 'publication'/exp OR 'information dissemination'/exp                                  | 153849  |
| #4  | right:ab,ti OR disseminat*:ab,ti OR reported:ab,ti OR reporting:ab,ti                                     | 2101478 |
| #5  | #1 OR #2                                                                                                  | 455     |
| #6  | #3 OR #4                                                                                                  | 2242914 |
| #7  | #5 AND #6                                                                                                 | 318     |
| #8  | bias*:ab,ti OR 'statistical bias'/exp                                                                     | 141571  |
| #9  | #7 AND #8                                                                                                 | 40      |
| #10 | #9 AND [embase]/lim NOT [medline]/lim                                                                     | 12      |

## 7. Research sponsors' guidelines

PubMed:

| Search | Query                                                                                                                                                                                                                       | Items found |
|--------|-----------------------------------------------------------------------------------------------------------------------------------------------------------------------------------------------------------------------------|-------------|
| #1     | Search ("Clinical Trials Directive"[tiab] OR "Declaration of Helsinki"[tiab] OR "CONSORT Statement"[tiab] OR "International Conference on Harmonisation"[tiab] AND (guideline*[tiab] OR standards[tiab] OR standard[tiab])) | 632         |
| #2     | Search (research[tiab] AND sponsor*[tiab] AND guideline*[tiab] AND (standard[tiab] OR standards[tiab]))                                                                                                                     | 89          |
| #3     | Search (#1 OR #2)                                                                                                                                                                                                           | 716         |
| #4     | Search ("Guidelines as Topic"[Mesh] OR "Guideline Adherence"[Mesh] OR "Quality Control"[Mesh])                                                                                                                              | 161305      |
| #5     | Search (compliance[tiab] OR adherence[tiab])                                                                                                                                                                                | 142255      |
| #6     | Search (#4 OR #5)                                                                                                                                                                                                           | 292729      |
| #7     | Search (#3 AND #6)                                                                                                                                                                                                          | 294         |
| #8     | Search ("Publication Bias"[Mesh] OR "Bias (Epidemiology)"[Mesh] OR bias*[tiab])                                                                                                                                             | 155818      |
| #9     | Search (#7 AND #8)                                                                                                                                                                                                          | 45          |
| #10    | Search (#9 NOT "Guideline"[Publication Type])                                                                                                                                                                               | 43          |

The Cochrane Library:

| ID | Search                                                                                                                                                                              | Hits  |
|----|-------------------------------------------------------------------------------------------------------------------------------------------------------------------------------------|-------|
| #1 | ((("Clinical Trials Directive" or "Declaration of Helsinki" or "CONSORT Statement" or "International Conference on Harmonisation") and (guideline* or standards or standard)):ti,ab | 168   |
| #2 | (research and sponsor* and guideline*):ti,ab                                                                                                                                        | 29    |
| #3 | #1 or #2                                                                                                                                                                            | 197   |
| #4 | [mh "Guidelines as Topic"] or [mh "Quality Control"] or [mh "guideline adherence"]                                                                                                  | 2855  |
| #5 | (compliance or adherence):ti,ab                                                                                                                                                     | 17111 |
| #6 | #4 or #5                                                                                                                                                                            | 19493 |
| #7 | #3 and #6                                                                                                                                                                           | 34    |
| #8 | [mh "publication bias"] or [mh "bias epidemiology"] or bias*:ti,ab,kw                                                                                                               | 14334 |
| #9 | #7 and #8                                                                                                                                                                           | 7     |

CINAHL,AMED,PsycINFO:

| #  | Query                                                                                                                                                                                                                                                                                                                                                                 | Results |
|----|-----------------------------------------------------------------------------------------------------------------------------------------------------------------------------------------------------------------------------------------------------------------------------------------------------------------------------------------------------------------------|---------|
| S1 | TI ( "Clinical Trials Directive" OR "Declaration of Helsinki" OR "CONSORT Statement" OR "International Conference on Harmonisation") AND (guideline* OR standards OR standard) ) OR AB ( ("Clinical Trials Directive" OR "Declaration of Helsinki" OR "CONSORT Statement" OR "International Conference on Harmonisation") AND (guideline* OR standards OR standard) ) | 183     |
| S2 | TI ( research AND sponsor* AND guideline* ) OR AB ( research AND sponsor* AND guideline* )                                                                                                                                                                                                                                                                            | 201     |
| S3 | S1 OR S2                                                                                                                                                                                                                                                                                                                                                              | 382     |
| S4 | TI bias* OR AB bias* OR SU bias*                                                                                                                                                                                                                                                                                                                                      | 82,818  |
| S5 | S3 AND S4                                                                                                                                                                                                                                                                                                                                                             | 32      |
| S6 | TI ( compliance OR adherence OR quality ) OR AB ( compliance OR adherence OR quality ) OR SU ( compliance OR adherence OR quality )                                                                                                                                                                                                                                   | 457,654 |
| S7 | S5 AND S6                                                                                                                                                                                                                                                                                                                                                             | 21      |

EMBASE:

| No. | Query                                                                                                                                                                                                              | Results |
|-----|--------------------------------------------------------------------------------------------------------------------------------------------------------------------------------------------------------------------|---------|
| #1  | 'clinical trials directive':ab,ti OR 'declaration of helsinki':ab,ti OR 'consort statement':ab,ti OR 'international conference on harmonisation':ab,ti AND (guideline*:ab,ti OR standards:ab,ti OR standard:ab,ti) | 981     |
| #2  | research:ab,ti AND sponsor*:ab,ti AND guideline*:ab,ti                                                                                                                                                             | 656     |
| #3  | #1 OR #2                                                                                                                                                                                                           | 1588    |
| #4  | 'practice guideline'/exp OR 'protocol compliance'/exp OR 'quality control'/exp                                                                                                                                     | 544048  |
| #5  | compliance:ab,ti OR adherence:ab,ti                                                                                                                                                                                | 192296  |
| #6  | #4 OR #5                                                                                                                                                                                                           | 714152  |
| #7  | #3 AND #6                                                                                                                                                                                                          | 854     |
| #8  | bias*:ab,ti OR 'statistical bias'/exp                                                                                                                                                                              | 141571  |
| #9  | #7 AND #8                                                                                                                                                                                                          | 72      |
| #10 | #9 AND [embase]/lim NOT [medline]/lim                                                                                                                                                                              | 14      |

## 8. Confirmatory large-scale trials

PubMed:

| Search | Query                                                                                                                                                                                                                                                                                                | Items found |
|--------|------------------------------------------------------------------------------------------------------------------------------------------------------------------------------------------------------------------------------------------------------------------------------------------------------|-------------|
| #1     | Search (confirmatory trial*[tiab] OR confirmatory study[tiab] OR confirmatory studies[tiab])                                                                                                                                                                                                         | 945         |
| #2     | Search ((large scale trial*[tiab] OR large trial*[tiab] OR Multicentre trial*[tiab] OR Multicenter trial*[tiab] OR large scale study[tiab] OR large scale studies[tiab] OR large study[tiab] OR large studies[tiab] OR multicenter study[tiab] OR multicentre studies[tiab]) AND confirmatory[tiab]) | 70          |
| #3     | Search (("Multicenter Studies as Topic"[Mesh] OR "Randomized Controlled Trials as Topic"[Mesh]) AND confirmatory[tiab])                                                                                                                                                                              | 160         |

|     |                                                                                                                                                                                                       |         |
|-----|-------------------------------------------------------------------------------------------------------------------------------------------------------------------------------------------------------|---------|
| #4  | Search <b>(#1 OR #2 OR #3)</b>                                                                                                                                                                        | 1110    |
| #5  | Search (" <b>Statistics as Topic</b> "[Mesh:NoExp] OR " <b>Epidemiologic Research Design</b> "[Mesh:NoExp] OR " <b>Reproducibility of Results</b> "[Mesh] OR " <b>Quality Control</b> "[Mesh])        | 381835  |
| #6  | Search ( <b>validity</b> [tiab] OR <b>validation</b> [tiab] OR <b>validating</b> [tiab] OR <b>refuting</b> [tiab] OR <b>refutation</b> [tiab] OR <b>assessing</b> [tiab] OR <b>assessment</b> [tiab]) | 866683  |
| #7  | Search <b>(#5 OR #6)</b>                                                                                                                                                                              | 1157732 |
| #8  | Search <b>(#4 AND #7)</b>                                                                                                                                                                             | 198     |
| #9  | Search (" <b>Publication Bias</b> "[Mesh] OR " <b>Bias (Epidemiology)</b> "[Mesh] OR <b>bias*</b> [tiab])                                                                                             | 155818  |
| #10 | Search <b>(#8 AND #9)</b>                                                                                                                                                                             | 21      |

The Cochrane Library:

| ID | Search                                                                                                                                            | Hits  |
|----|---------------------------------------------------------------------------------------------------------------------------------------------------|-------|
| #1 | (confirmatory next/3 (trial or study or studies)):ti,ab (Word variations have been searched)                                                      | 157   |
| #2 | ([mh "Multicenter Studies as Topic"] or [mh "Randomized Controlled Trials as Topic"]) and confirmatory:ti,ab (Word variations have been searched) | 13    |
| #3 | #1 or #2                                                                                                                                          | 164   |
| #4 | [mh "publication bias"] or [mh "bias epidemiology"] or bias*:ti,ab,kw                                                                             | 14334 |
| #5 | #3 and #4                                                                                                                                         | 6     |

CINAHL,AMED,PsycINFO:

| #  | Query                                                                                                                                                                                                | Results |
|----|------------------------------------------------------------------------------------------------------------------------------------------------------------------------------------------------------|---------|
| S1 | TI ( confirmatory N3 (trial OR study OR studies) ) OR AB ( confirmatory N3 (trial OR study OR studies) )                                                                                             | 1,271   |
| S2 | TI ( validity OR validation OR validating OR refuting OR refutation OR assessing OR assessment ) OR AB ( validity OR validation OR validating OR refuting OR refutation OR assessing OR assessment ) | 540,41  |
| S3 | SU "research design" OR Reproducibility OR "Research Design" OR quality                                                                                                                              | 425,54  |
| S4 | S2 OR S3                                                                                                                                                                                             | 896,43  |
| S5 | S1 AND S4                                                                                                                                                                                            | 665     |
| S6 | TI bias* OR AB bias* OR SU bias*                                                                                                                                                                     | 82,818  |
| S7 | S5 AND S6                                                                                                                                                                                            | 22      |

EMBASE:

| No. | Query                                                                                                                               | Results |
|-----|-------------------------------------------------------------------------------------------------------------------------------------|---------|
| #1  | (confirmatory NEXT/3 (trial OR study OR studies)):ab,ti                                                                             | 1590    |
| #2  | 'multicenter study (topic)'/exp OR 'randomized controlled trial (topic)'/exp AND confirmatory:ab,ti                                 | 92      |
| #3  | #1 OR #2                                                                                                                            | 1658    |
| #4  | 'reproducibility'/exp OR 'quality control'/exp                                                                                      | 382542  |
| #5  | validity:ab,ti OR validation:ab,ti OR validating:ab,ti OR refuting:ab,ti OR refutation:ab,ti OR assessing:ab,ti OR assessment:ab,ti | 1112684 |
| #6  | #4 OR #5                                                                                                                            | 1395508 |
| #7  | #3 AND #6                                                                                                                           | 290     |

|    |                                                        |               |
|----|--------------------------------------------------------|---------------|
| #8 | <b>bias*:</b> ab,ti OR ' <b>statistical bias</b> '/exp | <b>141571</b> |
| #9 | <b>#7 AND #8</b>                                       | <b>15</b>     |
